# Supplementary material for: SGRL can regulate chlorophyll metabolism and contributes to normal plant growth and development in Pisum sativum L
Source: PubMed Central journal article supplement (PMC4659853; doi:10.1007/s11103-015-0372-4), 2015-09-07
Supplement: 11103_2015_372_MOESM3_ESM.pdf [file 11103_2015_372_MOESM3_ESM.pdf]

S3a

```

JI1201 -----
JI281 -----AC 2
JI2202 -----
Comeor GATTTTGGATTGTTGCGGTGTTTGAACAGAATCACACAGTCCACA CGAACAAACCAACT 60
JI2822 GATTTTGGATTGTTGCGGTGTTTGAACAGAATCACACAGTCCACA AGAACAAACCAACT 60

JI1201 -----CTT 3
JI281 TGAGACACTAATTTCCACATCACTCTTCTTTCTCTCTCTTTCTATCTCTAACTCTT 60
JI2202 -----ATTTCCACATCACTCTTCTTTCTCTCTCTTTCTATCTCTAACTCTT 50
Comeor GAGAACACTAATTTCCACATCACTCTTCTTTCTCTCTCTTTCTATCTCTAACTCTT 118
JI2822 GAGAACACTAATTTCCACATCACTCTTCTTTCTCTCTCTTTCTATCTCTAACTCTT 117
***

JI1201 TTAAC TA CAGAAGAACAAGGAAAGAAGATAATGGTGGTGACATGTGAAACATGAAGAGGA 63
JI281 TTAACAGCAGAAGAACAAGGAAAGAAGATAATGGTGGTGACATGTGAAACATGAAGAGTA 120
JI2202 TTAAC TA CAGAAGAACAAGGAAAGAAGATAATGGTCTTGACATGTGAAACATGAAGAGGA 110
Comeor TTAACAGCAGAAGAACAAGGAAAGAAGATAATGGTGGTGACATGTGAAACATGAAGAGTA 178
JI2822 TTAAC TA CAGAAGAACAAGGAAAGAAGATAATGGTGGTGACATGTGAAACATGAAGAGGA 177
*****

JI1201 CTGTATTATTAT TATGCATCTTCAATGGCATCATTATGTCATAATGCCTTTTCATTTTCA 123
JI281 CTGTATTATTAT GCATCTTCAATGGCATCATTATGTCATAATGCCTTTTCATTTTCA 177
JI2202 CTGTATTATTAT GCATCTTCAATGGCATCATTATGTCATAATGCCTTTTCATTTTCA 167
Comeor CTGTATTATTAT GCATCTTCAATGGCATCATTATGTCATAATGCCTTTTCATTTTCA 235
JI2822 CTGTATTATTAT TATGCATCTTCAATGGCATCATTATGTCATAATGCCTTTTCATTTTCA 237
*****

JI1201 CCTACAAAACCTTTCCCTATCATGTTAAAGCCATCTTTCAGATGCTCCTCCATTACTACT 183
JI281 CCTACAAAACCTTTCCCTATCATGTTAAAGCCATCTTTCAGATGCTCCTCCATTACTACT 237
JI2202 CCTACAAAACCTTTCCCTATCATGTTAAAGCCATCTTTCAGATGCTCCTCCATTACTACT 227
Comeor CCTACAAAACCTTTCCCTATCATGTTAAAGCCATCTTTCAGATGCTCCTCCATTACTACT 295
JI2822 CCTACAAAACCTTTCCCTATCATGTTAAAGCCATCTTTCAGATGCTCCTCCATTACTACT 297
*****

JI1201 AATTCACACCTTCCCTACAATTCCATTGTTTTGAGGTTCCCTTAACTCTCTTTCTCT 243
JI281 AATTCACACCTTCCCTACAATTCCATTGTTTTGAGGTTCCCTTAACTCTCTCTCTCT 293
JI2202 AATTCACACCTTCCCTACAATTCCATTGTTTTGAGGTTCCCTTAACTCTCTTTCTCT 287
Comeor AATTCACACCTTCCCTACAATTCCATTGTTTTGAGGTTCCCTTAACTCTCTCTCTCT 351
JI2822 AATTCACACCTTCCCTACAATTCCATTGTTTTGAGGTTCCCTTAACTCTCTCTCTCT 353
*****

JI1201 TTCACTTTCTTATTATGCATTCAATATTAATACTTAATGTAGCAATTGCAATCTTTATA 303
JI281 TTCACTTTCTTATTATGCATTCAATATTAATACTTAATGTAGCAATTGCAATCTTTATA 353
JI2202 TTCACTTTCTTATTATGCATTCAATATTAATACTTAATGTAGCAAGTTGCAATCTTTATA 343
Comeor TTCACTTTCTTATTATGCATTCAATATTAATACTTAATGTAGCAAGTTGCAATCTTTATA 411
JI2822 TTCACTTTCTTATTATGCATTCAATATTAATACTTAATGTAGCAAGTTGCAATCTTTATA 413
*****

JI1201 CCTATGCATGAGAAACCTCATTTACTCATATGTCAATGTGTAGAATGAATTGTGCTTCTTC 363
JI281 CCTATGCATGAGAAACCTCATTTACTCATATGTCAATGTGTAGAATGAATTGTGCTTCTTC 413
JI2202 TCTATGCATGAGAAACCTCAATTTACTCATATGTCAATGTGTAGAATGAATTGTGCTTCTTC 403
Comeor CCTATGCATGAGAAACCTCATTTACTCATATGTCAATGTGTAGAATGAATTGTGCTTCTTC 471
JI2822 CCTATGCATGAGAAACCTCATTTACTCATATGTCAATGTGTAGAATGAATTGTGCTTCTTC 473
*****

JI1201 TATATTACTTCAATGATCCGTGGATTTGTTAAACATTTTCACTTTTCTTGATTTGTTATGA 423
JI281 TATATTACTTCAATGATCCGTGGATTTGTTAAACATTTTCACTTTTCTTGATTTGTTATGA 473
JI2202 TATATTACTTCAATGATCCGTGGATTTGTTAAACATTTTCACTTTTCTTGATTTGTTATGA 463
Comeor TATATTACTTCAATGATCCGTGGATTTGTTAAACATTTTCACTTTTCTTGATTTGTTATGA 531
JI2822 TATATTACTTCAATGATCCGTGGATTTGTTAAACATTTTCACTTTTCTTGATTTGTTATGA 533
*****

```

JI1201 CTGCTTTGATTCATTCAAGTTATCACTGAATTAGGGTTTAGGGATTAAACTGTTTACAAA 483  
JI281 CTGCTTTGATTCATTCAAGTTATCACTGAATTAGGGTTTAGGGATTAAACTGTTTACAAA 533  
JI2202 CTGCTTTGATTCATTCAAGTTATCACTGAATTAGGGTTTAGGGATTAAACTGTTTACAAA 523  
Cameor CTGCTTTGATTCATTCAAGTTATCACTGAATTAGGGTTTAGGGATTAAACTGTTTACAAA 591  
JI282 CTGCTTTGATTCATTCAAGTTATCACTGAATTAGGGTTTAGGGATTAAACTGTTTACAAA 593  
\*\*\*\*\*

JI1201 ATTAGTATTCATGAGATAGTTCCCTGCAATTGAAAATATGCCTATAGGAATACGAATCCAT 543  
JI281 ATTAGTATTCATGAGATAGTTCCCTGCAATTGAAAATATGCCTATAGGAATACGAATCCAT 593  
JI2202 ATTAGTATTCATGAGATAGTTCCCTGCAATTGAAAATATGCCTATAGGAATACGAATCCAT 583  
Cameor ATTAGTATTCATGAGATAGTTCCCTGCAATTGAAAATATGCCTATAGGAATACGAATCCAT 651  
JI282 ATTAGTATTCATGAGATAGTTCCCTGCAATTGAAAATATGCCTATAGGAATACGAATCCAT 653  
\*\*\*\*\*

JI1201 GATTAACCATAGTAGTCTATAAATTGTTATTTAGATGAAGAAAACAGTGAATTTCTTCTGT 603  
JI281 GATTAACCATAGTAGTCTATAAATTGTTATTTGATGAAGAAAACAGTGAATTTCTTCT-- 651  
JI2202 GATTAACCATAGTAGTCTATAAATTGTTATTTGATGAAGAAAACAGTGAATTTCTTCTGT 643  
Cameor GATTAACCATAGTAGTCTATAAATTGTTATTTAGATGAAGAAAACAGTGAATTTCTTCTGT 711  
JI282 GATTAACCATAGTAGTCTATAAATTGTTATTTAGATGAAGAAAACAGTGAATTTCTTCTGT 713  
\*\*\*\*\*

JI1201 CTCTTGAATATCATTAGGATCTTATTTATATTCATTATATAAGATTTTACCTGTTTTT 663  
JI281 -----TTATATTCATTATGTAAGATTT--ACCTGTTTTT 683  
JI2202 CTCTTGAATATTATTAGGATCTTATTTATATTCATTATATAAGATTT--ACCTGTTTTT 701  
Cameor CTCTTGAATATTATTAGGATCTTATTTATATTCATTATATAAGATTTTACCTGTTTTT 771  
JI282 CTCTTGAATATTATTAGGATCTTATTTATATTCATTATATAAGATTT--ACCTGTTTTT 771  
\*\*\*\*\*

JI1201 TGTTTTTTTTTGTTTTTTATCCTTAGACTGTTAGGCTATTGGGTCCTCCAACAAAATTTG 723  
JI281 TGTTTTTTTTTGTTTTTTATCCTTAGACTGTTAGGCTATTGGGTCCTCCAACAAAATTTG 743  
JI2202 TGTTTTTTTTTGTTTTTTATCCTTAGACTGTTAGGCTATTGGGTCCTCCAACAAAATTTG 760  
Cameor TGTTTTTTTTTGTTTTTTATCCTTAGACTGTTAGGCTATTGGGTCCTCCAACAAAATTTG 831  
JI282 TGTTTTTTTTTGTTTTTTATCCTTAGACTGTTAGGCTATTGGGTCCTCCAACAAAATTTG 831  
\*\*\*\*\*

JI1201 AAGTTCAAAGCTGAAGGTTGTTCTATTGGAAGATCAGATTAACAGATATGCAAGTATTA 783  
JI281 AAGTTCAAAGCTGAAGGTTGTTCTATTGGAAGATCAGATTAACAGATATGCAAGTATTA 803  
JI2202 AAGTTCAAAGCTGAAGGTTGTTCTATTGGAAGATCAGATAAACAGATATGCAAGTATTA 820  
Cameor AAGTTCAAAGCTGAAGGTTGTTCTATTGGAAGATCAGATTAACAGATATGCAAGTATTA 891  
JI282 AAGTTCAAAGCTGAAGGTTGTTCTATTGGAAGATCAGATTAACAGATATGCAAGTATTA 891  
\*\*\*\*\*

JI1201 TCCAAGAACCTACATTCTATCCCACCTGTGATTTAACAGCTAATCTCACTTTAGCTGTTT 843  
JI281 TCCAAGAACCTACATTCTATCCCACCTGCGATTTAACAGCTAATCTCACTTTAGCTGTTT 863  
JI2202 TCCAAGAACCTACATTCTATCCCACCTGTGATTTAACAGCTAATCTCACTTTAGCTGTTT 880  
Cameor TCCAAGAACCTACATTCTATCCCACCTGTGATTTAACAGCTAATCTCACTTTAGCTGTTT 951  
JI282 TCCAAGAACCTACATTCTATCCCACCTGTGATTTAACAGCTAATCTCACTTTAGCTGTTT 951  
\* \*\*\*\*\*

JI1201 CCAATGTCATCAAACTCGAGCAGGTTTGTGTCTTTATGTTTTGCCTGCTTTGCGTGGAA 903  
JI281 CCAATGTCATCAAACTCGAGCAGGTTTGTGTCTTTATGTTTTGCCTGCTTTGCGTGGAA 923  
JI2202 CCAATGTCATCAAACTCGAGCAGGTTTGTGTCTTTATGTTTTGCCTGCTTTGCGTGGAA 940  
Cameor CCAATGTCATCAAACTCGAGCAGGTTTGTGTCTTTATGTTTTGCCTGCTTTGCGTGGAA 1011  
JI282 CCAATGTCATCAAACTCGAGCAGGTTTGTGTCTTTATGTTTTGCCTGCTTTGCGTGGAA 1011  
\*\*\*\*\*

JI1201 AATTAGTCTTTGACGCATATTTTGAACGAAGGAAAATGCTAACAAGTGCCCTTTAGAAAAAT 963  
JI281 AATTAGTCTTTGACGCATATTTTGAACGAAGGAAAATGCTAACAAGTGCCCTTTAGAAAAAT 983  
JI2202 AATTAGTCTTTGACGCATATTTTGAACGAAGGAAAATGCTAACAAGTGCCCTTTAGAAAAAT 1000  
Cameor AATTAGTCTTTGACGCATATTTTGAACGAAGGAAAATGCTAACAAGTGCCCTTTAGAAAAAT 1071  
JI282 AATTAGTCTTTGACGCATCTTTTTTAAACGAAGGAAAATGCTAACAAGTGCCCTTTAGAAAAAT 1071  
\*\*\*\*\*

JI1201 TGAATGCGTTTATTGCAAATAACACAATTCCTTTGATACTTCTTTTAAGTAATTGAACCC 1022  
JI281 TGAATGCGTTTATTGCAAATAACACAATTCCTTTGATACTTCTTTTAAGTAATTGAACCC 1043  
JI2202 TGAATGCGTTTATTGCAAATAACACAATTCCTTTGATACTTCTTTTAAGTAATTGAACCC 1060  
Cameor TGAATGCGTTTATTGCAAATAACACAATTCCTTTGATACTTCTTTTAAGTAATTGAACCC 1130  
JI282 TGAACGCATTTATTGCAAATAACACAATTCGTTTGATACTTCTTTTAAGTG----- 1122  
\*\*\*\* \*\* \*\*\*\* \*\*\*\*\*

JI1201 ATTTTTTAGGGTCCCCTTAGGTTGTTTCATTAGTATAAGTTATGCTTAATTAGCACATG 1082  
JI281 ATTTTTTAGGGTCCCCTTAGGTTGTTTCATTAGTATAAGTTATGCTTAATTAGCACATG 1103  
JI2202 ATTTTTTAGGGTCCCCTTAGGTTGTTTCATTAGTATA-----TGCTTAATTAGCACATG 1114  
Cameor ATTTTTTAGGGTCCCCTTAGGTTGTTTCATTAGTATAAGTTATGCTTAATTAGCACATG 1190  
JI282 -----GGGTCCCCTTAGGTTGTTTCATTAGTATAAGTTATGCTTAATTAGCACATG 1174  
\*\*\*\* \*\*\*\*\*

JI1201 TTTGATGTCTTGTATTTCCTTGTGTGAAATGGCAGTTGAGAGGGTGGTACCAGAAGGATGA 1142  
JI281 TTTGATGTCTTGTATTTCCTTGTGTGAAATGGCAGTTGAGAGGGTGGTACCAGAAGGATGA 1163  
JI2202 TTTGATGTCTTGTATTTCCTTGTGTGAAATGGCAGTTGAGAGGGTGGTACCAGAAGGATGA 1174  
Cameor TTTGATGTCTTGTATTTCCTTGTGTGAAATGGCAGTTGAGAGGGTGGTACCAGAAGGATGA 1250  
JI282 TTTGATGTCTTGTATTTCCTTGTGTGAAATGGCAGTTGAGAGGGTGGTACCAGAAGGATGA 1234  
\*\*\*\*\*

JI1201 TGTGTAGCTGAATGGAAGAAAGTGAAGAATGAAATGTGCCTACATGTTTCATTGCTTTGT 1202  
JI281 TGTGTAGCTGAATGGAAGAAAGTGAAGAATGAAATGTGCCTACATGTTTCATTGCTTTGT 1223  
JI2202 TGTGTAGCTGAATGGAAGAAAGTGAAGAATGAAATGTGCCTACATGTTTCATTGCTTTGT 1234  
Cameor TGTGTAGCTGAATGGAAGAAAGTGAAGAATGAAATGTGCCTACATGTTTCATTGCTTTGT 1310  
JI282 TGTGTAGCTGAATGGAAGAAAGTGAAGAATGAAATGTGCCTACATGTTTCATTGCTTTGT 1294  
\*\*\*\*\*

JI1201 TAGTGGTCCTAATTCCTTCCTAGATCTCGCTGCTGAGTTAGATATCACATTTTCTCCAA 1262  
JI281 TAGTGGTCCTAATTCCTTCCTAGATCTCGCTGCTGAGTTAGATATCACATTTTCTCCAA 1283  
JI2202 TAGTGGTCCTAATTCCTTCCTAGATCTCGCTGCTGAGTTAGATATCACATTTTCTCCAA 1294  
Cameor TAGTGGTCCTAATTCCTTCCTAGATCTCGCTGCTGAGTTAGATATCACATTTTCTCCAA 1370  
JI282 TAGTGGTCCTAATTCCTTCCTAGATCTCGCTGCTGAGTTAGATATCACATTTTCTCCAA 1354  
\*\*\*\*\*

JI1201 GGAAATGCCTTTGGTATGTTTGCCTTAAATTTATATTATCCCCTTAATGCATCCAATTC 1322  
JI281 GGAAATGCCTTTGGTATGTTTGCCTTAAATTTATATTATCCCCTTAATGCATCCAATTC 1343  
JI2202 GGAAATGCCTTTGGTATGTTTGCCTTAAATTTACATTATCCCCTTAATGCATCCAATTC 1354  
Cameor GGAAATGCCTTTGGTATGTTTGCCTTAAATTTATATTATCCCCTTAATGCATCCAATTC 1430  
JI282 GGAAATGCCTTTGGTATGTTTGCCTTAAATTTATATTATCCCCTTAATGCATCCAATTC 1414  
\*\*\*\*\*

JI1201 TATCAAACAGGAATAATCTGAGAACTAGAACTAGGACTGTTCTAACATGTTCTCCCTCT 1382  
JI281 TATCAAACAGGAATAATCTGAGAACTAGAACTAGGACTGTTCTAACATGTTCTCCCTCT 1403  
JI2202 TATCAAACAGGAATAATCTGAGAACTAGAACTAGGACTGTTCTAACATGTTCTCCCTCT 1414  
Cameor TATCAAACAGGAATAATCTGAGAACTAGAACTAGGACTGTTCTAACATGTTCTCCCTCT 1490  
JI282 TATCAAACAGGAATAATCTGAGAACTAGAACTAGGACTGTTCTAACATGTTCTCTCTCT 1474  
\*\*\*\*\*

JI1201 GGACTCAAATATAAGCAAAAAATAGTCATATGCGCACCAATTAATAATTCAGTGAAATT 1442  
JI281 GGACTCAAATATAAGCAAAAAATAGTCATATGCGCACCAATTAATAATTCAGTGAAATT 1463  
JI2202 GGACTCAAATATAAGCAAAAAATAGTCATATGCGCACCAATTAATAATTCAGTGAAATT 1474  
Cameor GGACTCAAATATAAGCAAAAAATAGTCATATGCGCACCAATTAATAATTCAGTGAAATT 1550  
JI282 GGACTCAAATATAAGCAAAAAATAGTCATATGCGCACCAATTAATAATTCAGTGAAATT 1534  
\*\*\*\*\*

JI1201 TTCTTCATGAAATAGAAGATGATTGTACTCTCCAAAGTCCAAACTCCTGTTTCTCTTCAT 1502  
JI281 TTCTTCATGAAATAGAAGATGATTGTACTCTCCAAAGTCCAAACTCCTGTTTCTCTTCAT 1523  
JI2202 TTCTTCATGAAATAGAAGATGATTGTACTCTCCAAAGTCCAAACTCCTGTTTCTCTTCAT 1534  
Cameor TTCTTCATGAAATAGAAGATGATTGTACTCTCCAAAGTCCAAACTCCTGTTTCTCTTCAT 1610  
JI282 TTCTTCATGAAATAGAAGATGATTGTACTCTCCAAAGTCCAAACTCCTGTTTCTCTTCAT 1594  
\*\*\*\*\*

JI1201 CTAATTTTCTATCAGAATTTGTTTGGTAACGCTAAACATGGTGAAGTTAGTTAGAAATTG 1562  
JI281 CTAATTTTCCATCAGAATTTGTTTGGTAACGCTAAACATGGTGAAGTTAGTTAGAAATTG 1583  
JI2202 C-----AGAATTTGTTTGGTAACGCTAAACATGGTGAAGTTAGTTAGAAATTG 1582  
Cameor CTAATTTTCTATCAGAATTTGTTTGGTAACGCTAAACATGGTGAAGTTAGTTAGAAATTG 1670  
JI282 CTAATTTTCTATCAGAATTTGTTTGGTAACGCTAAACATGGTGAAGTTAGTTAGAAATTG 1654  
\* \*\*\*\*\*

JI1201 TTTATGTTTGAGTCCGGAGGTAGTATTTCTACATTGCAACCTTATCGAAGAGTTGCATATG 1622  
JI281 TTTATGTTTGAGTCTGGAGGTAGTATTTCTACATTGCAACCTTATCGAAGAGTTGCATATG 1643  
JI2202 TTTATGTTTGAGTCCGGAGGTAGTATTTCTACATTGCAACCTTATCGAAGAGTTGCATATG 1642  
Cameor TTTATGTTTGAGTCCGGAGGTAGTATTTCTACATTGCAACCTTATCGAAGAGTTGCATATG 1730  
JI282 TTTATGTTTGAGTCCGGAGGTAGTATTTCTACATTGCAACCTTATCGAAGAGTTGCATATG 1714  
\*\*\*\*\*

JI1201 GATCCCAATTAGTGAAGTGTGTTGTTGCTAATTGCTAAAGCATGTCATTGCTCAAAATGA 1682  
JI281 GATCCCAATTAGTGAAGTGTGTTGTTGCTAATTGCTAAAGCATGTCATTGCTCAAAATGA 1703  
JI2202 GATCCCAATTAGTGAAGTGTGTTGTTGCTAATTGCTAAAGCATGTCATTGCTCAAAATGA 1702  
Cameor GATCCCAATTAGTGAAGTGTGTTGTTGCTAATTGCTAAAGCATGTCATTGCTCAAA---- 1786  
JI282 GATCCCAATTAGTGAAGTGTGTTGTTGCTAATTGCTAAAGCATGTCATTGCTCAAAATGA 1774  
\*\*\* \*\*\*\*\*

JI1201 ACATAACAGCTTATAAAGAAGATTTCATATAAAAAATATGGGGTAAGAAACGAGAATTTAA 1742  
JI281 ACATAACAGCTTATAAAGAAGATTTCATATAAAAAATATGGGGTAAGAAACGAGAATTTAA 1763  
JI2202 ACATAACAGCTTATAAAGAAGATTTCATATAAAAAATATGGGGTAAGAAACGAGAATTTAA 1762  
Cameor -----TAAAGAAGATTTCATATAAAAAATATGGGGTAAGAAACGAGAATTTAA 1833  
JI282 ACATAACAGCTTATAAAGAAGATTTCATATAAAAAATATGGGGTAAGAAACGAGAATTTAA 1834  
\*\*\*\*\*

JI1201 TGATAGCCTTTTCGCGTAAACTTACACTTAAGCCTATTATGAACTGCAATCGTGATATACT 1802  
JI281 TGATAGCCTTTTCGCGTAAACTTACACTTAAGCCTATTATGAACTGCAATCGTGATATACT 1823  
JI2202 TGATAGCCTTTTCGCGTAAACTTACACTTAAGCCTATTATGAACTGCAATCGTGATATACT 1822  
Cameor TGATAGCCTTTTCGCGTAAACTTACACTTAAGCCTATTATGAACTGCAATCGTGATATACT 1893  
JI282 TGATAGCCTTTTCGCGTAAACTTACACTTAAGCCTATTATGAACTGCAATCGTGATATACT 1894  
\*\*\*\*\*

JI1201 ATATCTGGTATGTAAATTGGTTCTCCAATTGCAGATTACTGGATTAGCAGTCCTATGCCT 1862  
JI281 ATATCTGGTATGTAAATTGGTTCTCCAATTGCAGATTACTGGATTAGCAGTCCTATGCCT 1883  
JI2202 ATATCTGGTATGTAAATTGGTTCTCCAATTGCAGATTACTGGATTAGCAGTCCTATGCCT 1882  
Cameor ATATCTGGTATGTAAATTGGTTCTCCAATTGCAGATTACTGGATTAGCAGTCCTATGCCT 1953  
JI282 ATATCTGGTATGTAAATTGGTTCTCCAATTGCAGATTACTGGATTAGCAGTCCTATGCCT 1954  
\*\*\*\*\*

JI1201 AAATGTATTATGACACATGGTTGGATTGTTGTCTTGACCATGCCAGGTACTCAAAGCAAT 1922  
JI281 AAATGTATTATGACACATGGTTGGATTGTTGTCTTGACCATGCCAGGTACTCAAAGCAAT 1943  
JI2202 AAATGTATTATGACACATGGTTGGATTGTTGTCTTGACCATGCCAGGTACTCAAAGCAAT 1942  
Cameor AAATGTATTATGACACATGGTTGGATTGTTGTCTTGACCATGCCAGGTACTCAAAGCAAT 2013  
JI282 AAATGTATTATGACACATGGTTGGATTGTTGTCTTGACCATGCCAGGTACTCAAAGCAAT 2014  
\*\*\*\*\*

JI1201 TCAATGCGGAGATTCTGAACTTTTCCACGAGCATCCAGAATTGCTGGATTCTATCGTTAG 1982  
JI281 TCAATGCGGAGATTCTGAACTTTTCCACGAGCATCCAGAATTGCTGGATTCTATCGTTAG 2003  
JI2202 TCAATGCGGAGATTCTGAACTTTTCCACGAGCATCCAGAATTGCTGGATTCTATCGTTAG 2002  
Cameor TCAATGCGGAGATTCTGAACTTTTCCACGAGCATCCAGAATTGCTGGATTCTATCGTTAG 2073  
JI282 TCAATGCGGAGATTCTGAACTTTTCCACGAGCATCCAGAATTGCTGGATTCTATCGTTAG 2074  
\*\*\*\*\*

JI1201 AGTATATTTCCATTCTAGCTCAAAAAATATACAACAGAATGGAATGTTGGGGCCCTTTAAG 2042  
JI281 AGTATATTTCCATTCTAGCTCAAAAAATATACAACAGAATGGAATGTTGGGGCCCTTTAAG 2063  
JI2202 AGTATATTTCCATTCTAGCTCAAAAAATATACAACAGAATGGAATGTTGGGGCCCTTTAAG 2062  
Cameor AGTATATTTCCATTCTAGCTCAAAAAATATACAACAGAATGGAATGTTGGGGCCCTTTAAG 2133  
JI282 AGTATATTTCCATTCTAGCTCAAAAAATATACAACAGAATGGAATGTTGGGGCCCTTTAAG 2134  
\*\*\*\*\*

JI1201 **GGATGCAATGGAG**GTAATATTAGGAAACACTGAAATGAGTAATTTACTATCTTTTTGAC 2102  
 JI281 **GGATGCAATGGAG**GTAATATTAGGAAACACTGAAATGAGTAATTTACTATCTTTTTGAC 2123  
 JI2202 **GGATGCAATGGAG**GTAATATTAGGAAACACTGAAATGAGTAATTTACTATCTTTTTGAC 2122  
 Cameor **GGATGCAATGGAG**GTAATATTAGGAAACACTGAAATGAGTAATTTACTATCTTTTTGAC 2193  
 JI2822 **GGATGCAATGGAG**GTAATATTAGGAAACACTGAAATGAGTAATTTACTACCTTTTTGAC 2194  
 \*\*\*\*\*

JI1201 ATGAGTAATCTTTACTTTTGTATTTTACCTTTGCCTTTTGTGTTTGTATCTGATTATGT 2162  
 JI281 ATGAGTAATCTTTACTTTTGTATTTTACCTTTGCCTTTTGTGTTTGTATCTGATTATGT 2183  
 JI2202 ATGAGTAATCTTTACTTTTGTATTTTACCTTTGCCTTTTGTGTTTGTATCTGATTATGT 2182  
 Cameor ATGAGTAATCTTTACTTTTGTATTTTACCTTTGCCTTTTGTGTTTGTATCTGATTATGT 2253  
 JI2822 ATGAGTAATCTTTACTTTTGTATTTTACCTTTGCCTTTTGTGTTTGTATCTGATTATGT 2254  
 \*\*\*\*\*

JI1201 TTCTTCGTGTTTTTCAG**GGAAAACGAGGCGATCAGTTACAAGGGTTGATAAACAGAGATCG** 2222  
 JI281 TTCTTCGTGTTTTTCAG**GGAAAACGAGGCGATCAGTTACAAGGGTTGATAAACAGAGATCG** 2243  
 JI2202 TTCTTCGTGTTTTTCAG**GGAAAACGAGGCGATCAGTTACAAGGGTTGATAAACAGAGATCG** 2242  
 Cameor TTCTTCGTGTTTTTCAG**GGAAAACGAGGCGATCAGTTACAAGGGTTGATAAACAGAGATCG** 2313  
 JI2822 TTCTTCGTGTTTTTCAG**GGAAAACGAGGCGATCAGTTACAAGGGTTGATAAACAGAGATCG** 2314  
 \*\*\*\*\*

JI1201 **TCCTCCTGAAGAATGGAGAAGCCCAATGTCCACATTC**CAAGCTCTTTT**GGCTATTCTTCT** 2282  
 JI281 **TCCTCCTGAAGAATGGAGAAGCCCAATGTCCACATTC**CAAGCTCTTTT**GGCTATTCTTCT** 2303  
 JI2202 **TCCTCCTGAAGAATGGAGAAGCCCAATGTCCACATTC**CAAGCTCTTTT**GGCTATTCTTCT** 2302  
 Cameor **TCCTCCTGAAGAATGGAGAAGCCCAATGTCCACATTC**CAAGCTCTTTT**GGCTATTCTTCT** 2373  
 JI2822 **TCCTCCTGAAGAATGGAGAAGCCCAATGTCCACATTC**CAAGCTCTTTT**GGCTATTCTTCT** 2374  
 \*\*\*\*\*

JI1201 **TTCAAATGTATTACTGGTAACTTGGTTGATTTGTTTATATCCCGATTC**TTT**CCTCAGCTA** 2342  
 JI281 **TTCAAATGTATTACTGGTAACTTGGTTGATTTGTTTATATCCCGATTC**TTT**CCTCAGCTA** 2363  
 JI2202 **TTCAAATGTATTACTGGTAACTTGGTTGATTTGTTTATATCCCGATTC**TTT**CCTCAGCTA** 2362  
 Cameor **TTCAAATGTATTACTGGTAACTTGGTTGATTTGTTTATATCCCGATTC**TTT**CCTCAGCTA** 2433  
 JI2822 **TTCAAATGTATTACTGGTAACTTGGTTGATTTGTTTATATCCCGATTC**TTT**CCTCAGCTA** 2400  
 \*\*\*\*\*

JI1201 **GAGCTGGGTGGGTTTAGACGAAGCAA**AATTCAGGTTGCAAGAATGACTATGAGAGGAATA 2402  
 JI281 **GAGCTGGGTGGGTTTAGACGAAGCAA**AATTCAGGTTGCAAGAATGACTATGAGAGGAATA 2423  
 JI2202 **GAGC**----- 2366  
 Cameor **GAGCTGGGTGGGTTTAGACGAAGCAA**AATTCAGGTTGCAAGAATGACTATGAGAGGAATA 2493  
 JI2822 **GAGC**-----  
 \*\*\*\*

JI1201 TGTAATAATTGCACAAAAACATATTACTTGTGCAATAAAGGAAATTT**CATTT**CATGAATTA 2462  
 JI281 TGTAATAATTGCACAAAAACATATTACTTGTGCAATAAAGGAAATTT**CATTT**CATGAATTA 2483  
 JI2202 ----- 2553  
 Cameor TGTAATAATTGCACAAAAACATATTACTTGTGCAATAAAGGAAATTT**CATTT**CATGAATTA 2553  
 JI2822 -----

JI1201 TGTAATTATGAAGTAAAGGAATTAACAGATTGGATTAAATCTCACTCAAAGATATGGCCT 2522  
 JI281 TGTAATTATGAAGTAAAGGAATTAACAGATTGGATTAAATCTCACTCAAAGATATGGCCT 2543  
 JI2202 ----- 2613  
 Cameor TGTAATTATGAAGTAAAGGAATTAACAGATTGGATTAAATCTCACTCAAAGATATGGCCT 2613  
 JI2822 -----

Start of transcription in cv. Cameor

SNP

Indel

Exon

START-STOP

S3b

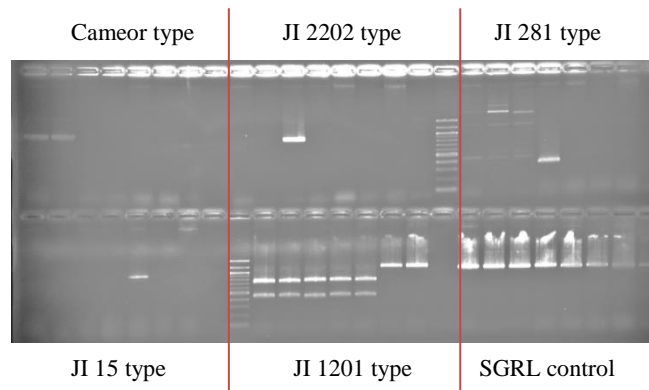

S3c

```

Cameor CATGCACTCTAGCATCATTACAATTAATATTTTTTCAAGAATTGCTAAATTAAGAATA 60
JI2822 TATGCACTCTAGTATCATTACAATTAATATTTTTTCCA GAATTGCTAAATTAAGAATA 60
*****

Cameor TATTTTTATTAACGAATTAGAGAAATTTGTTAAAGGAGTATTCCCTCCATTTTTATCAT 120
JI2822 TATTTTTATTAAGAATTAGAGAAATTTGTTAAAGTAGGATTCCCTCTATTTTTTATTAT 120
*****

Cameor AAATTATTTGAAAAATAAAATTTGTAAGTCAGTTTACACTACCAATAAATAAATAGTGT 180
JI2822 AAGTCAATTTGAAAAATAAAATTATAAGTCAGTTTACACTACCAATAAATAAATAATGT 180
** *

Cameor ATTTTATTATTATACTTTTAAAAATTTATTATTATCTTTTATTTAATTATATGACACA 239
JI2822 ATTTTTTCTATTATACTTTTAAAAATTTATTATTATCTCTTATTTTAAATTATATAACACA 240
*****

Cameor TTAATAATATTATAAAAATTTTATAATTTTTTATTTTCATACAAATAATAATTATTATTT 299
JI2822 TTAATAATATTATAAAAATCTATAATTTTTTATTTTCATACATAAATAATTATTATTTTCT 300
*****

Cameor TAATTACTTATGAAAAGTTCAAAAAGTTTATAATAAATAGTATTATAAGAG----- 352
JI2822 TAATTACTTATGAAAAGTTCAAAAAGTTTCTAATAAAAAACGTTCAAAGAAATGTTGTA 360
*****

Cameor AAAGCAGGTCTGGGTGAGTTGATCCGAAACCGAACGCTGATCCAAGTAAAGCCACCTC 411
JI2822 TAAAGCAGGTCTGGGTGAGTTGATCCGAAACCGAACGCTGATCCAAGTAAAGCCACCTC 420
*****

Cameor GTTACATTATCCATCCAAAAGTTATCGAAAATTTGAAGTATTGATGACGTGGCACAGCA 471
JI2822 GTTACATTATCCATCCAAAAGTTATCGAAAATTTGAAGTATTGATGACGTGGCACAGCA 479
*****

Cameor CATTCAATCCCATTCTCCATTACAATGTGTTTGTGTGTTTAAATTTTCTATGATTAATG 531
JI2822 CATTCAATCCCATTCTCCATTACAATGTGTTTGTGTGTTTAAATTTTCTATGATTAATG 539
*****

Cameor TTAACTAATAAAAATAAAGTAAAAGAAAAGAAAATGTGTGGAAGAAATGGATTGATA 591
JI2822 TTAACTAATAAAAATAAAGTAAAAGAAAAGAAAATGTGTGGAAGAAATGGATTGATA 599
*****

Cameor GAGATTTTGGATTGTTGCGGTGTTTGAACAGAATCACACAGTCCACACGAACAAACCAA 651
JI2822 GAGATTTTGGATTGTTGCGGTGTTTGAACAGAATCACACAGTCCACAAAGAACAAACCAA 659
*****

```

Cameor CTGAGAACACTAATTTCCCACATCACTCCCTTCTTTCTCTCTCTTTCTATCTCTAACTCTT 711  
JI2822 CTGAGAACACTAATTTCCCACATCAGCTCTTTCTTTCTCTCTCTTTCTATCTCTAACTCTT 718  
\*\*\*\*\*

Cameor TTAACAGCAGAAGAACAAGGAAAGAAGATAATGGTGGTGACATGTGAAACATGAAGAGTA 771  
JI2822 TTAACAGCAGAAGAACAAGGAAAGAAGATAATGGTGGTGACATGTGAAACATGAAGAGGA 778  
\*\*\*\*\*

Cameor CTGTATTATTATGCATCTTCA 792  
JI2822 CTGTATTATTATATGCATCTTCA 802  
\*\*\*\*\*

Start of transcription in cv. Cameor

Indel

Differences in predicted promoter motifs
