# Supplementary material for: SGRL can regulate chlorophyll metabolism and contributes to normal plant growth and development in Pisum sativum L
Source: PubMed Central journal article supplement (PMC4659853; doi:10.1007/s11103-015-0372-4), 2015-09-07

S4

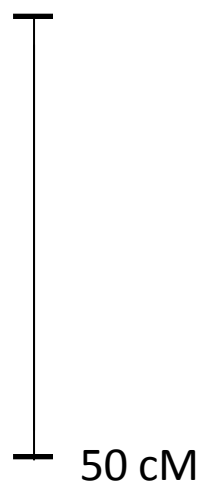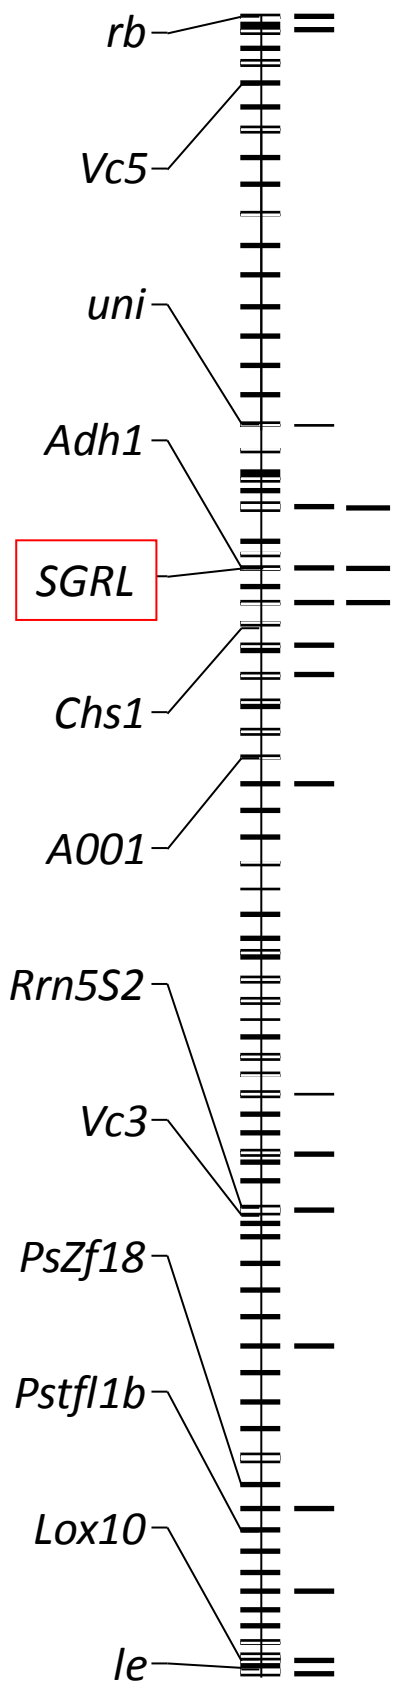

Supplement: 11103_2015_372_MOESM4_ESM.pdf [file 11103_2015_372_MOESM4_ESM.pdf]
