# Supplementary material for: SGRL can regulate chlorophyll metabolism and contributes to normal plant growth and development in Pisum sativum L
Source: PubMed Central journal article supplement (PMC4659853; doi:10.1007/s11103-015-0372-4), 2015-09-07
Supplement: 11103_2015_372_MOESM8_ESM.pdf [file 11103_2015_372_MOESM8_ESM.pdf]

S8

SGRL MASLCHNAFSFSPTKLFPIMLKPSFRCSITTNSTPSYNSIVFETVRLGPPPKFEASKL 60  
MASLCHNAFSFSPTKLFPIMLKPSFRCSITTNSTPSYNSIVFETVRLGPPPKFEASKL  
\*\*\*\*\*

SGRL KVVLEDQINRYASIIIPRTYILSHCDLTANLTLAVSNVIKLEQLRGWYQKDDVVAEWKKV 120  
KVVLEDQINRYASIIIPRTYILSHCDLTANLTLAVSNVIKLEQLRGWYQKDDVVAEWKKV  
\*\*\*\*\*

SGRL KNEMCLHVHCFVSGPNSFLDLAAEFYHIFSKEMPLVLKAIQCGDSELFHEHPELDSIV 180  
KNEMCLHVHCFVSGPNSFLDLAAEFYHIFSKEMPLVLKAIQCG-----  
\*\*\*\*\*

SGRL RVPFHSSSKIYNRMECNGPLRDAMEGKRGDQLQGLINRDRPPEEWRSPMSSTFQALFALL 240  
-----EGKRGDQLQGLINRDRPPEEWRSP-----  
\*\*\*\*\*

SGRL SNVLLVTWLIICLYPDSFLS 259  
-----
