# Supplementary material for: SGRL can regulate chlorophyll metabolism and contributes to normal plant growth and development in Pisum sativum L
Source: PubMed Central journal article supplement (PMC4659853; doi:10.1007/s11103-015-0372-4), 2015-09-07
Supplement: 11103_2015_372_MOESM11_ESM.pdf [file 11103_2015_372_MOESM11_ESM.pdf]

**Supplementary Table 1** List of primers used in this work

| Purpose                                 | Amplicon length (bps)                                     | Primer names                                                      | Primer sequences                                                                                                                                                 |
|-----------------------------------------|-----------------------------------------------------------|-------------------------------------------------------------------|------------------------------------------------------------------------------------------------------------------------------------------------------------------|
| SGRL sequence identification            | 692                                                       | MK_C15f<br>MK_C15rev                                              | CATAATGCCTTTTCATTTTCACC<br>TGTAGGTTCTTGGGATAAATACTTGC                                                                                                            |
| SGRL sequence identification            | Nested primers for suppression PCR                        | SGRL-R1<br>SGRL-R2                                                | AAAGATGGCTTTAACATGATAGGG<br>GGTGA AAAATGAAAAGGCATTATG                                                                                                            |
| SGRL sequence identification            | Nested primers for suppression PCR                        | SGRL-F1<br>SGRL-F2                                                | GCAAGTATTATCCCAAGAACCTACA<br>TCTATCCCACTGTGATTTAACAGC                                                                                                            |
| SGRL sequence identification            | Nested primers for suppression PCR                        | SGRL-F3<br>SGRL-F4                                                | GTTTATGTTTGTAGTCCGGAGG<br>ATTGCAACCTTATCGAAGAGTTG                                                                                                                |
| SGRL JI 281 x JI 399 mapping            | 692, cut by SspI                                          | MK_C15f<br>MK_C15rev                                              | CATAATGCCTTTTCATTTTCACC<br>TGTAGGTTCTTGGGATAAATACTTGC                                                                                                            |
| SGRL Princess x JI 185 mapping          | 897<br>Sequencing primer                                  | SGRL-F8<br>SGRL-R1<br>SGRL-R3                                     | CGAACCTACTGTGTTTTGGGG<br>AAAGATGGCTTTAACATGATAGGG<br>ATCAACTCACCAGACCTGC                                                                                         |
| SGRL diversity screen                   | 1250                                                      | SGRL-F9<br>SGRL-R7                                                | GATTTTGGATTGTTGCGGTG<br>TCATCCTTCTGGTACCACCC                                                                                                                     |
| SGRL diversity screen                   | 1121                                                      | SGRL-F2<br>SGRL-R4                                                | TCTATCCCACTGTGATTTAACAGC<br>GAATCTCCGCATTGAATTGC                                                                                                                 |
| SGRL diversity screen                   | 1163                                                      | SGRL-F10<br>SGRL-R5                                               | TTGCTTTGTTAGTGGTCTAATT<br>GAATTTTGTCTCGTCTAAACCC                                                                                                                 |
| SGRL diversity screen                   | 717                                                       | SGRL-F4<br>SGRL-R11                                               | ATTGCAACCTTATCGAAGAGTTG<br>TCGGGATATAAACAATCAACC                                                                                                                 |
| SGRL TILLING genotyping                 | 736                                                       | SGRL-F4<br>SGRL-R5                                                | ATTGCAACCTTATCGAAGAGTTG<br>GAATTTTGTCTCGTCTAAACCC                                                                                                                |
| SGRL 'Cameor' specific                  | 919                                                       | SGRL-F1<br>SGRL-diag3R                                            | GCAAGTATTATCCCAAGAACCTACA<br>CTGAATCTTGTATTATTGAGC                                                                                                               |
| SGRL 'JI 2822' specific                 | 929                                                       | SGRL-diag1F<br>SGRL-R4                                            | CGTTTGATACTCTTTTAAAGTGGG<br>GAATCTCCGCATTGAATTGC                                                                                                                 |
| SGRL 'JI 2202' specific                 | 881                                                       | SGRL-diag5F<br>SGRL-R4                                            | CTTAGGTTGTTCAATGATATATCC<br>GAATCTCCGCATTGAATTGC                                                                                                                 |
| SGRL 'JI 281' specific                  | 351                                                       | SGRL-diag6F<br>SGRL-R7                                            | CCTACATTCTATCCCCTCC<br>TCATCCTTCTGGTACCACCC                                                                                                                      |
| SGRL 'JI 1201' specific                 | 1200, cut by BamHI to 750 and 350                         | SGRL-F10<br>SGRL-R5                                               | TTGCTTTGTTAGTGGTCTAATT<br>GAATTTTGTCTCGTCTAAACCC                                                                                                                 |
| SGRL 'control' for allele specific PCR  | 1121                                                      | SGRL-F2<br>SGRL-R4                                                | TCTATCCCACTGTGATTTAACAGC<br>GAATCTCCGCATTGAATTGC                                                                                                                 |
| SGRL 5'UTR limit identification         | Gene specific primers used                                | SGRL-R4<br>SGRL-R7                                                | GAATCTCCGCATTGAATTGC<br>TCATCCTTCTGGTACCACCC                                                                                                                     |
| SGRL 3'UTR limit identification         | Gene specific primers used                                | SGRL-F10<br>SGRL-F6                                               | TTGCTTTGTTAGTGGTCTAATT<br>TCTGAAGAATGGAGAAGCC                                                                                                                    |
| SGRL constructs                         | 841/838 (HIS)                                             | attB1-SGRL-F<br>attB2-SGRL-R<br>attB2-SGRL-R-HIS                  | GGGGACAAGTTTGTAAAAAAGCAGGCTCAATGGCATCATTATGTCATA<br>GGGGACCACTTTGTACAAGAAAGCTGGGTTCTAGCTGAGGAAAAGAAATCGG<br>GGGGACCACTTTGTACAAGAAAGCTGGGTAGCTGAGGAAAAGAAATCGGGAT |
| SGR constructs                          | 847/844 (HIS)                                             | attB1-SGR-F<br>attB2-SGR-R<br>attB2-SGR-R-HIS                     | GGGGACAAGTTTGTACAAGAAAGCTGGGTAGCTGAGGAAAAGAAATCGG<br>GGGGACCACTTTGTACAAGAAAGCTGGGTTTACAAGTTACCATGTTGGG<br>GGGGACCACTTTGTACAAGAAAGCTGGGTACAAGTTACCATGTTGGGGAT     |
| PaO constructs                          | 1660/1657 (HIS)                                           | attB1-PaO-F<br>attB2-PaO-R<br>attB2-PaO-R-HIS                     | GGGGACAAGTTTGTACAAGAAAGCTGGGTAGCTGAGGAAAAGAAATCGG<br>GGGGACCACTTTGTACAAGAAAGCTGGGTTTCAATCGATTTCGGCATGTA<br>GGGGACCACTTTGTACAAGAAAGCTGGGTAATCGATTTCGGCATGTAAT     |
| SGRL3421 HIS tagged construct           | 649 (HIS)                                                 | attB1-SGRL-F<br>attB2-3421-HIS                                    | GGGGACAAGTTTGTAAAAAAGCAGGCTCAATGGCATCATTATGTCATA<br>GGGGACCACTTTGTACAAGAAAGCTGGGTAACATCCATTCTGTGTAT                                                              |
| SGRL (S241 <sup>STOP</sup> ) constructs | 784/781 (HIS)                                             | attB1-SGRL-F<br>attB2-S241 <sup>STOP</sup> -R<br>attB2-S241-HIS   | GGGGACAAGTTTGTAAAAAAGCAGGCTCAATGGCATCATTATGTCATA<br>GGGGACCACTTTGTACAAGAAAGCTGGGTTTCAAAGAAGAATAGCAAAAA<br>GGGGACCACTTTGTACAAGAAAGCTGGGTTAAGAAGAATAGCAAAAAAGAG    |
| SGRL (M229 <sup>STOP</sup> ) constructs | 748/745 (HIS)                                             | attB1-SGRL-F<br>attB2-M229 <sup>STOP</sup> -R<br>attB2-M229-R-HIS | GGGGACAAGTTTGTAAAAAAGCAGGCTCAATGGCATCATTATGTCATA<br>GGGGACCACTTTGTACAAGAAAGCTGGGTACTATGGGCTTCTCCATTCTT<br>GGGGACCACTTTGTACAAGAAAGCTGGGTATGGGCTTCTCCATTCTTCAG     |
| SGRL qPCR primers                       | 104                                                       | SGRL-F<br>SGRL-R                                                  | GCAATGGAGGAAAAACGAGGC<br>GCAAAAAAGAGCTTGGAAATGTGG                                                                                                                |
| SGR qPCR primers                        | 139                                                       | QSGR-2F<br>QSGR-2rev                                              | CGCAATGGAAGAAGTGAAG<br>AAAGCCTTCAACACCACAGG                                                                                                                      |
| Actin qPCR reference gene               | 104                                                       | PsActF<br>PsActR                                                  | CACAATTGGCGCTGAAAGAT<br>TAATTGAGTTAAATGTCGCTCATGGA                                                                                                               |
| pDONR vector sequence checks            | Variable                                                  | pDONR-Fs<br>pDONR-R                                               | GTTAACGCTAGCATGGATCTC<br>GTAACATCAGAGATTTTGGACAC                                                                                                                 |
| DEST 1/3 vector sequence checks         | Variable                                                  | M13-F<br>M13-R                                                    | GTA AAAACGACGGCCAGTG<br>GGA AACAGCTATGACCATG                                                                                                                     |
| DEST 1/3 vector sequence checks         | Variable                                                  | attB1-Fs<br>attB2-Rs                                              | ACAAGTTTGTACAAAAAAGCAGGC<br>ACCATTGTACAAGAAAGCTGGG                                                                                                               |
| Suppression PCR adaptor pair            | use with BamHI, BclI, BglII, BstYI                        | APX1 top<br>APX1 lower                                            | GATCACCTGCCAA<br>CGTCTGATGCTGACTACGCTTGCATCGTCGCTCCGGGCAGGT                                                                                                      |
| Suppression PCR adaptor pair            | use with ClaI, MspI, TaqI                                 | TPX1 top<br>TPX1 lower                                            | CGTCGTGCGTGCAA<br>CGTCTGATGCTGACTACGCTTGCATCGTCGCTCCGCACGCACGA                                                                                                   |
| Suppression PCR adaptor pair            | use with DraI, HpaI, EcoRV, NaeI, ScaI, PvuII, SspI, StuI | APX1Blunt top<br>APX1Blunt lower                                  | ACCTGCCAA<br>CGTCTGATGCTGACTACGCTTGCATCGTCGCTCCGGGCAGGT                                                                                                          |
| Suppression PCR primers                 | Variable                                                  | APX1A<br>APX1B                                                    | CGTCTGATGCTGACTACGCT<br>ACTACGCTTGCATCGTCGCT                                                                                                                     |
| cDNA synthesis primer                   |                                                           | A236                                                              | GACTCGAGAATTGGATCCTTTTTTTTTTTTTTTT                                                                                                                               |
| Poly-A adaptor primer                   |                                                           | A237                                                              | GACTCGAGAATTGGATCC                                                                                                                                               |
